# The well-being and work-related stress of senior school leaders in Wales and Northern Ireland during the COVID-19 pandemic: A cross-sectional descriptive study

Emily Marchant<sup>1</sup> ¶\*, Joanna Dowd<sup>2</sup> &, Lucy Bray<sup>3</sup> &, Gill Rowlands<sup>4</sup> &, Nia Miles<sup>5</sup> &, Tom Crick<sup>1</sup> &, Michaela James<sup>6</sup> &, Kevin Dadaczynski<sup>7,8</sup> &, Orkan Okan<sup>9,10</sup> &

<sup>1</sup> Department of Education and Childhood Studies, Faculty of Humanities and Social Sciences, Swansea University, United Kingdom

<sup>2</sup> Health Researcher (Freelance), Northern Ireland, United Kingdom

<sup>3</sup> School of Nursing, Midwifery and Allied Health, Faculty of Health, Social Care and Medicine, Edge Hill University, United Kingdom

<sup>4</sup> Public Health Sciences Institute, Newcastle University, United Kingdom

<sup>5</sup> National Academy for Educational Leadership Wales, United Kingdom

<sup>6</sup> National Centre for Population Health and Wellbeing Research, Population Data Science, Faculty of Medicine, Health and Life Science, Swansea University, United Kingdom

<sup>7</sup> Department of Health Sciences, Fulda University of Applied Sciences, Germany

<sup>8</sup> Centre for Applied Health Sciences, Leuphana University Lüneburg, Germany

<sup>9</sup> School of Medicine and Health, Department of Sport and Health Sciences, Center for Health and Medicine in Society, Munich, Germany

<sup>10</sup> School of Medicine and Health, Department of Sport and Health Sciences, Center for Health Promotion in Childhood and Adolescence, Munich, Germany

\*Corresponding author

Email: [E.K.Marchant@swansea.ac.uk](mailto:E.K.Marchant@swansea.ac.uk)

¶ These authors contributed equally to this work.

& These authors also contributed equally to this work.

# Abstract

The COVID-19 pandemic caused far-reaching societal changes, including significant educational impacts, affecting over 1.6 billion pupils and 100 million education practitioners globally. Senior school leaders were at the forefront; an occupation already reporting high work-related stress and large numbers leaving the profession preceding COVID-19, leaders were exposed to high demands relating to the numerous challenges they had to manage during a “*crisis leadership*” period. This cross-sectional descriptive study through the international COVID-HL network aimed to examine the well-being and work-related stress of senior school leaders (n=323) in Wales (n=172) and Northern Ireland (n=151) during COVID-19 (2021-2022). Findings suggest that senior school leaders reported high workloads (54.22±11.30 hours/week), low well-being (65.2% n=202, mean WHO-5 40.85±21.57), depressive symptoms (WHO-5 34.8% n=108) and high work-related stress (PSS-10: 29.91±4.92). High exhaustion (BAT: high/very high 89.0% n=285) and specific psychosomatic complaints (experiencing muscle pain 48.2% n=151) were also reported, and females had statistically higher outcomes in these areas. School leaders were engaging in self-endangering working behaviours; 74.7% (n=239) gave up leisure activities in favour of work and 63.4% (n=202) sacrificed sufficient sleep, which was statistically higher for females. These findings are concerning given that the UK is currently experiencing a “*crisis*” in educational leadership against a backdrop of pandemic-related pressures. Senior leaders’ high attrition rates further exacerbate this, proving costly to educational systems and placing additional financial and other pressures on educational settings and policy response. This has implications for senior leaders and pupil-level outcomes including health, well-being and educational attainment, requiring urgent tailored and targeted support from the education and health sectors. This is particularly pertinent for Wales and Northern Ireland as devolved nations in the UK, who are both implementing or contemplating major education system level reforms, including new statutory national curricula, requiring significant leadership, engagement and ownership from the education profession.

## 23 Introduction

24 The COVID-19 pandemic caused unprecedented changes in all areas of society. It required the implementation of  
 25 an unprecedented range of public health measures to reduce social contacts and transmission of SARS-CoV-2.  
 26 Across all educational settings and contexts this included changes to the delivery of learning, teaching and  
 27 assessment, such as full or partial face-to-face closures, a move to hybrid and blended learning, and the  
 28 introduction of a variety of measures upon the full return to education [1–6]. These significant and prolonged  
 29 changes to the delivery of teaching and learning impacted all those within education, including pupils, educational  
 30 support staff, teachers, and senior school leaders (e.g. headteachers, deputy headteachers, senior leadership  
 31 team) [7]. At its peak, over 1.6 billion learners and 100 million educational practitioners globally were affected by  
 32 disruption to education [8].

33 Research efforts were initially focused on the impacts of the pandemic on school children and teaching staff [8].  
 34 However, senior school leaders were at the forefront of educational leadership, who were required to navigate  
 35 an evolving working situation and environment. This required rapid decision-making, school management and  
 36 leadership relating to the numerous new protocols and policies they had to master and manage. Senior school  
 37 leaders are responsible for all aspects of school life and therefore had to cope with high demands due to the  
 38 COVID-19 pandemic, a period defined as “*crisis leadership*” [9,10]. Responsibilities included rapidly responding to  
 39 government guidelines, managing communication with education authorities and the school community, ensuring  
 40 professional development and continuity of learning and safeguarding vulnerable children.

41 Prior to COVID-19, concerns were raised regarding educational leaders’ workload, well-being, recruitment and  
 42 retention within the profession [11,12] and experts had referred to a “potential crisis in leadership in education”  
 43 [13]. It is well documented that educational leaders are prone to high levels of work-related stress, burnout, and  
 44 reduced well-being, reporting higher stress levels than other occupations and the general population [14–17].  
 45 Furthermore, evidence suggests gender differences exist in perceptions of stress and exhaustion, with female

school leaders exhibiting higher perceived stress [18] and symptoms of exhaustion and fatigue compared to their male counterparts [19]; further research is required to examine this in the context of COVID-19.

These existing pressures on educational leaders were exacerbated during the COVID-19 pandemic in a time that required “*constant crisis and change management*” [20]. This was fuelled further by intense scrutiny of school leaders by policymakers, parents and the media, in addition to a shift from local to national decision making and accountability [21]. These psychological and physical impacts can transcend to learners, with a body of evidence demonstrating an association between school leadership quality and student outcomes, including achievement, health and well-being [22,23]. Thus, the additional work-related pressures during a period of “*crisis leadership*” are likely to have had significant impacts on educational leaders, and research is urgently required to assess these impacts to direct appropriate resources and support.

This cross-sectional descriptive study was conducted through the international *COVID Health Literacy* (COVID-HL) network [24]. The network was established in 2020 to enable collaborative and cross-country health literacy research and includes more than 150 researchers from over 60 countries. Through the COVID-HL network, a number of surveys were developed to examine the impact of the COVID-19 pandemic on educational settings, including the *COVID-19 School Principals Survey* [25], which has been administered in 17 countries to date [26–30]. This study aimed to examine the working situation, well-being and work-related stress of senior school leaders in Wales and Northern Ireland and explore gender differences as a whole sample during the COVID-19 pandemic 2021 and 2022.

## Materials and Methods

The *COVID-19 School Principals Survey* was administered in Wales between June and November 2021 and Northern Ireland between March and May 2022. This was part of an ongoing international study through the COVID-HL network, and the survey has been administered in 17 countries globally at the time of writing.

## Sample and recruitment

Inclusion criteria were: any member of staff with a senior leadership position, recognised in the UK as senior leadership team (SLT). This includes the headteacher or deputy/assistant headteacher, in addition to members of the SLT with leadership or management responsibilities (e.g. head of school/department/subject area, or senior pastoral role such as pupil well-being). Senior leaders were required to be currently working within any primary (ages 3-11), secondary (ages 11-16) or special educational setting. A convenience sample of participants were recruited via email, social media and through education stakeholders. Recruitment in Wales was facilitated by HAPPEN (*Health and Attainment of Pupils in Primary Education*) Wales [31,32], a pan-Wales infrastructure that connects research with primary schools, directly aligning with the new *Curriculum for Wales* [33] (which is phasing in from September 2022) and its health and well-being area of learning and experience, alongside the increased policy prominence of health literacy. The recruitment period in Wales was from 1<sup>st</sup> June 2021 to 14<sup>th</sup> November 2021. In addition, stakeholder support was received from the National Academy for Educational Leadership Wales [34] who distributed the survey through their networks. In Northern Ireland, the survey was emailed to all primary, post-primary and special schools, and a reminder was also sent to encourage uptake. The recruitment period in Northern Ireland was from 31<sup>st</sup> January 2022 to 31<sup>st</sup> May 2022. The survey was securely administered online via Microsoft Forms with a survey link emailed to participants. Participants received an information sheet detailing the study aims, objectives, their rights, including their right to withdraw and information regarding anonymity and confidentiality and were required to provide written informed consent, confirming that they had read the

information sheet and understood what participation involved. The survey took approximately 20-30 minutes to complete.

## The COVID-19 School Principal Survey

The *COVID-19 School Principal Survey* [25] was designed by the international COVID-HL network and adapted for Wales and Northern Ireland (S1 and S2 Fig). It asks participants a range of questions regarding their work situation, including general work-related factors, health, well-being, work-related Sense of Coherence, exhaustion and psychosomatic complaints, self-endangering behaviour and perceived stress. The inclusion criteria for the survey are any senior leadership staff (headteacher, deputy headteacher, senior leadership team). A full copy of the survey is available in the S1 and S2 Fig.

## Measures

### Demographic characteristics

Data regarding demographic characteristics were collected, including gender (male, female, prefer not to say), type of school (primary, post-primary/secondary), specific leadership position at school (e.g. headteacher, deputy headteacher, senior leadership team e.g. with leadership, management or pastoral responsibilities), school size, percentage of pupils from different socioeconomic groups (self-defined as low, medium, high) and percentage of their pupils eligible for free school meals. Free school meals are used as a proxy measure of deprivation, eligibility criteria at the time of the study were any child living in a household which gets income-related benefits and has an annual income less than £7,400 in Wales [35] or £14,000 in Northern Ireland [36].

### Work-related factors

Participants were asked questions regarding their workload, including their total weekly working hours, weekly teaching hours and changes in their workload compared to before the COVID-19 pandemic (higher, about the same, lower than before the COVID-19 pandemic).

## General health

The subjective health of participants was examined using the WHO-endorsed item of the self-perception of health status, which asks about ‘*health in general*’ [37]. This has been found to be associated with other health measures, use of health services and survival rate in adults. In the current study, participants responded to a single-item question ‘*How is your health in general?*’ using a 5-point Likert scale (1-5) from ‘*Very good*’ to ‘*Very bad*’ [38]. Lower mean values indicate better perceived general health.

## Well-being

The 5-item *World Health Organization Well-being Index* (WHO-5) was used to measure the subjective psychological well-being of senior school leaders [39]. Participants were asked to indicate how they had been feeling in the past two weeks in relation to five statements, including ‘*I have felt cheerful and in good spirits*’. Responses followed a 6-point Likert scale and were scored from 0 (*None of the time*) to 5 (*All of the time*). These were summed to calculate a total raw score between 0 to 25, and this total raw score was multiplied by 4, providing a final WHO-5 score between 0 (complete absence of well-being) to 100 (highest imaginable level of well-being). Mean scores were calculated, in addition to binary variables, a cut-off score of  $\leq 50$  is indicative of low well-being [40], and  $\leq 28$  indicative of depressive symptoms [41].

## Work-related Sense of Coherence

*Sense of Coherence* (SoC) is a framework which explains how people manage stressful situations to maintain their health and well-being. Work-related SoC is used as an indicator for the health-promoting quality of life at work. It consists of three concepts; comprehensibility (how an individual perceives their work situation as structured, consistent and coherent, as opposed to unpredictable and chaotic), manageability (how an individual perceives the availability of resources to cope with demands in the workplace) and meaningfulness (the extent to which a person perceives their work situation as worthy of commitment and involvement) [42]. Work-related SoC was captured using a 9-item scale with responses following a Likert scale (each item score ranging from 1-7) relating to how participants were finding their work situation. For the comprehensibility sub-scale (items 1, 3, 6 and 9),

items were '*Unmanageable - manageable*', '*Unstructured - unstructured*', '*Unclear - clear*' and '*Unpredictable - predictable*'. The manageability sub-scale (items 4 and 7) includes '*Impossible to influence – easy to influence*' and '*Uncontrollable - controllable*'. The meaningfulness sub-scale was captured in items '*Meaningless - meaningful*', '*Insignificant - significant*'. Total scores were summed, and the three sub-scales scores were summed, and mean values calculated. Higher values indicate a higher SoC.

## Exhaustion and psychosomatic complaints

Work-related exhaustion was assessed using the short-form exhaustion items from the *Burnout Assessment Tool* (BAT) [43]. This asked participants to rate on a 5-item Likert scale from Never to Always (scored 1-5) three statements relating to how they were experiencing their work situation including '*At work, I feel mentally exhausted*'. For psychosomatic complaints, the following items from the BAT were assessed using the same Likert scale as above, asking participants how often they suffer from, for example, '*Palpitations and/or chest pain*'. Total scores and mean values for exhaustion and psychosomatic complaints were calculated, with higher scores indicating higher work-related fatigue or psychosomatic complaints. In addition, statistical norms based on percentiles derived from Schaufeli, De Witte and Desart [43] categorised the exhaustion sub-scale as low, average, high or very high.

## Self-endangering behaviour

Participants' self-endangering behaviour, recognised as behaviours that may be functional to attaining work goals in response to coping with excessive working demands, but have a negative effect on longer-term health, well-being and ability to work were assessed. Three sub-scales of the subjective self-endangering work behaviour scale were used; the 6-item work extensification (extending working hours), 3-item work intensification (working at an increased pace and multitasking, whilst limiting break periods and work-related social interactions) and 3-item quality reduction (reducing the quality of work in reaction to excessive work demands). For each sub-scale, participants were asked in relation to the past three months, and responses were scored using a 5-point Likert scale from '*Never*' to '*Very often*'. Total scores and mean values were calculated for each sub-scale, with higher



values indicating higher self-endangering behaviours. Krause et al. [44] report very good reliability of the subjective self-endangering work behaviour scale and acceptable to good reliability within sub-scales.

## Perceived stress

Perceived stress was captured using a 10-item measure based on the original *Perceived Stress Scale* by Cohen [45], adapted by Schneider et al. [46] and applied to the COVID-19 working context by Dadaczynski, Okan and Messer [25]. Participants were asked how often they had found aspects of their working situation in the last month, including '*Felt confident about your ability to handle your professional work-related problems caused by the COVID-19 pandemic*'. The 10-item adapted PSS consists of two sub-scales; *Perceived Helplessness* (items 1, 2, 3, 6, 9, 10), which represents a lack of control of negative emotions, and *Perceived Self-Efficacy* (items 4, 5, 7, 8), how effective the person feels in coping with demands. A 5-item Likert scale scored responses were from 1 ('Never') to 5 ('Very often'). A total score was summed by combining perceived helplessness item scores and the reverse scoring of perceived self-efficacy items. In addition, sub-scale total scores (perceived self-efficacy reverse scored) were calculated. Total mean and sub-scale values were calculated, higher values indicate higher perceived stress. High content and construct validity have been reported by Schneider et al. [46].

## Data analysis

Data were handled using IBM SPSS Statistics (version 28) to calculate descriptive statistics describing frequencies and percentages, and independent samples t-tests explored differences between gender.

## Ethics

This study received ethical approval from the Swansea University Medical School Research Ethics Committee (approval number: 2021-0043). All participants were required to provide written informed consent to participate in the study. Participants in Northern Ireland were made aware that due to the anonymous nature of the survey, they were not able to withdraw their data after pressing submit. For Wales, personal data (name and school) were collected for the purposes of data linkage, and participants were informed of their right to withdraw.

# Results

## Demographic characteristics

Table 1 and 2 present the demographic characteristics of study participants by whole sample, country (Table 1) and gender (Table 2). In total, 323 school leaders participated in the *COVID-19 School Principal Study*, of which 172 were from Wales (53.25%) and 151 from Northern Ireland (46.75%) (Table 1). Of the whole sample, 67.5% (n=216) were female. The sample consisted of 83.2% (n=253) primary schools, and 80.6% headteachers (n=257). School-level demographic characteristics reported by participants show the mean and median number of students at senior leaders' schools ( $357.48 \pm 333.10$ , 240). The percentage of pupils in low, medium and high socioeconomic groups within senior leaders' schools were reported (whole group;  $43.17 \pm 29.62$ ,  $46.19 \pm 27.23$ ,  $7.70 \pm 10.59$ ). The majority of senior leaders worked within schools with 0-20% of pupils eligible for free school meals (43.8%).

**Table 1: Demographic characteristics (whole sample, n=323, and by country)**

|                                     |                          | % (n)<br>mean $\pm$ standard deviation |                  |                     |
|-------------------------------------|--------------------------|----------------------------------------|------------------|---------------------|
|                                     |                          | Whole sample                           | Wales            | Northern Ireland    |
| <b>Total</b>                        |                          | 323                                    | 172 (53.25%)     | 151 (46.75%)        |
| <b>Gender</b>                       | <i>Male</i>              | 32.5% (104)                            | 63 (37.3%)       | 41 (27.2%)          |
|                                     | <i>Female</i>            | 67.5% (216)                            | 106 (62.7%)      | 110 (72.8%)         |
|                                     | <i>Prefer not to say</i> | <5                                     | <5               | <5                  |
| <b>School type</b>                  | <i>Primary</i>           | 83.2% (253)                            | 130 (81.3%)      | 123 (85.4%)         |
|                                     | <i>Secondary</i>         | 16.8% (51)                             | 30 (18.7%)       | 21 (14.6%)          |
| <b>Leadership position</b>          | <i>Headteacher</i>       | 80.6% (257)                            | 133 (79.2%)      | 124 (82.1%)         |
|                                     | <i>Deputy</i>            | 8.2% (26)                              | 14 (8.3%)        | 12 (7.9%)           |
|                                     | <i>headteacher</i>       | 11.3% (36)                             | 21 (12.5%)       | 15 (9.9%)           |
|                                     | <i>Senior leadership</i> |                                        |                  |                     |
| <b>Number of students in school</b> | <i>Mean</i>              | $357.48 \pm 333.10$                    | $396 \pm 360.55$ | $314.21 \pm 294.82$ |
|                                     | <i>Median</i>            | 240                                    | 250              | 220                 |
|                                     | <i>0-200</i>             | 128 (40.1%)                            | 57 (33.9%)       | 71 (47.0%)          |
|                                     | <i>201-400</i>           | 96 (30.1%)                             | 54 (32.1%)       | 42 (27.8%)          |
|                                     | <i>401-600</i>           | 48 (15.0%)                             | 29 (17.3%)       | 19 (12.6%)          |
|                                     | <i>601+</i>              | 47 (14.7%)                             | 28 (16.7%)       | 19 (12.6%)          |

|                                                                      |                |               |               |               |
|----------------------------------------------------------------------|----------------|---------------|---------------|---------------|
| <b>Percentage of students in school from socioeconomic groups</b>    | <i>Low</i>     | 43.17 ± 29.62 | 44.28 ± 31.06 | 42.08 ± 28.20 |
|                                                                      | <i>Medium</i>  | 46.19 ± 27.23 | 46.64 ± 28.55 | 45.75 ± 25.98 |
|                                                                      | <i>High</i>    | 7.70 ± 10.59  | 7.56 ± 10.88  | 7.84 ± 10.32  |
| <b>Percentage of pupils in school eligible for free school meals</b> | <i>0-20%</i>   | 140 (43.8%)   | 84 (48.8%)    | 56 (37.1%)    |
|                                                                      | <i>21-40%</i>  | 116 (36.3%)   | 67 (39.0%)    | 49 (32.5%)    |
|                                                                      | <i>41-60%</i>  | 40 (12.5%)    | 15 (8.7%)     | 25 (16.6%)    |
|                                                                      | <i>61-80%</i>  | 20 (6.3%)     | <5            | 17 (11.3%)    |
|                                                                      | <i>81-100%</i> | 4 (1.3%)      | 0             | <5            |

**Table 2 Demographic characteristics (by gender)**

|                                                                      |                           | <b>% (n)</b><br><b>mean ± standard deviation</b> |                 |
|----------------------------------------------------------------------|---------------------------|--------------------------------------------------|-----------------|
|                                                                      |                           | <b>Male</b>                                      | <b>Female</b>   |
| <b>Total</b>                                                         |                           | 104 (32.2%)                                      | 216 (66.9%)     |
| <b>School type</b>                                                   | <i>Primary</i>            | 70 (71.4%)                                       | 182 (88.8%)     |
|                                                                      | <i>Secondary</i>          | 28 (28.6%)                                       | 23 (11.2%)      |
| <b>Leadership position</b>                                           | <i>Headteacher</i>        | 81 (79.4%)                                       | 175 (81.0%)     |
|                                                                      | <i>Deputy headteacher</i> | 7 (6.9%)                                         | 19 (8.8%)       |
|                                                                      | <i>Senior leadership</i>  | 14 (13.7%)                                       | 22 (10.2%)      |
| <b>Number of students in school</b>                                  | <i>Mean</i>               | 449.47 ± 397.49                                  | 309.54 ± 288.28 |
|                                                                      | <i>Median</i>             | 340                                              | 220             |
|                                                                      | <i>0-200</i>              | 32 (31.4%)                                       | 96 (44.4%)      |
|                                                                      | <i>201-400</i>            | 30 (29.4%)                                       | 66 (30.6%)      |
|                                                                      | <i>401-600</i>            | 14 (13.7%)                                       | 33 (15.3%)      |
|                                                                      | <i>601+</i>               | 26 (25.5%)                                       | 21 (9.7%)       |
| <b>Percentage of students in school from socioeconomic groups</b>    | <i>Low</i>                | 37.70 ± 26.49                                    | 45.77 ± 30.81   |
|                                                                      | <i>Medium</i>             | 49.71 ± 24.66                                    | 44.47 ± 28.37   |
|                                                                      | <i>High</i>               | 8.84 ± 10.80                                     | 7.19 ± 10.49    |
| <b>Percentage of pupils in school eligible for free school meals</b> | <i>0-20%</i>              | 47 (45.6%)                                       | 92 (42.6%)      |
|                                                                      | <i>21-40%</i>             | 41 (39.8%)                                       | 75 (34.7%)      |
|                                                                      | <i>41-60%</i>             | 11 (10.7%)                                       | 29 (13.4%)      |
|                                                                      | <i>61-80%</i>             | 4 (3.9%)                                         | 16 (7.4%)       |
|                                                                      | <i>81-100%</i>            | 0                                                | <5              |

Tables 3 and 4 present the descriptive statistics of senior leaders' working situation, well-being and work-related stress by whole sample, country (Table 3) and gender (Table 4). The distribution of responses can be viewed in the S3 Fig. Complete cases are presented, and responses with a minimum of five participants' data are presented for purposes of anonymity.

**Table 3: Descriptive statistics of senior leaders' well-being, working situation and work-related stress (whole sample, country)**

|                                             |                             | % (n)                         |                   |                   |
|---------------------------------------------|-----------------------------|-------------------------------|-------------------|-------------------|
|                                             |                             | Mean $\pm$ standard deviation |                   |                   |
|                                             |                             | Whole sample                  | Wales             | Northern Ireland  |
| <b>Working situation</b>                    | <i>Teaching hours</i>       | 10.29 $\pm$ 14.97             | 7.12 $\pm$ 13.14  | 13.85 $\pm$ 16.09 |
|                                             | <i>Workload hours</i>       | 54.22 $\pm$ 11.30             | 54.93 $\pm$ 11.33 | 53.43 $\pm$ 11.26 |
| <b>Workload compared to before COVID-19</b> | <i>Lower</i>                | 12 (3.8%)                     | 8 (4.9%)          | <5                |
|                                             | <i>About the same</i>       | 91 (29.0%)                    | 65 (39.9%)        | 26 (17.2%)        |
|                                             | <i>Higher</i>               | 211 (67.2%)                   | 90 (55.2%)        | 121 (80.1%)       |
| <b>General health</b>                       | <i>Good/very good</i>       | 226 (69.9%)                   | 135 (79.4%)       | 91 (60.3%)        |
|                                             | <i>Mean</i>                 | 2.09 $\pm$ 0.86               | 1.91 $\pm$ 0.81   | 2.27 $\pm$ 0.87   |
| <b>WHO-5</b>                                | <i>Mean</i>                 | 40.85 $\pm$ 21.57             | 44.93 $\pm$ 21.62 | 36.08 $\pm$ 20.59 |
|                                             | <i>Low well-being</i>       | 202 (65.2%)                   | 91 (54.5%)        | 111 (77.6%)       |
|                                             | <i>Depressive symptoms</i>  | 108 (34.8%)                   | 47 (28.1%)        | 61 (42.7%)        |
| <b>Sense of coherence</b>                   | <i>Mean</i>                 | 3.95 $\pm$ 1.21               | 4.16 $\pm$ 1.25   | 3.71 $\pm$ 1.13   |
|                                             | <i>Comprehensibility</i>    | 3.61 $\pm$ 1.26               | 3.83 $\pm$ 1.30   | 3.36 $\pm$ 1.16   |
|                                             | <i>Manageability</i>        | 3.33 $\pm$ 1.38               | 3.54 $\pm$ 1.42   | 3.10 $\pm$ 1.31   |
|                                             | <i>Meaningfulness</i>       | 4.83 $\pm$ 1.48               | 5.01 $\pm$ 1.49   | 4.58 $\pm$ 1.43   |
| <b>Exhaustion</b>                           | <i>Mean</i>                 | 3.74 $\pm$ 0.76               | 3.52 $\pm$ 0.80   | 4.00 $\pm$ 0.62   |
|                                             | <i>High/very high</i>       | 285 (89.0%)                   | 138 (81.2%)       | 147 (98.0%)       |
| <b>Psychosomatic complaints</b>             | <i>Mean</i>                 | 2.70 $\pm$ 0.83               | 2.58 $\pm$ 0.85   | 2.83 $\pm$ 0.80   |
| <b>Self-endangering behaviour</b>           | <i>Work extensification</i> | 4.35 $\pm$ 0.55               | 4.33 $\pm$ 0.51   | 4.36 $\pm$ 0.59   |
|                                             | <i>Work intensification</i> | 4.20 $\pm$ 0.79               | 4.01 $\pm$ 0.84   | 4.42 $\pm$ 0.67   |
|                                             | <i>Quality reduction</i>    | 3.47 $\pm$ 0.76               | 3.31 $\pm$ 0.75   | 3.65 $\pm$ 0.73   |
| <b>Perceived stress</b>                     | <i>Total score</i>          | 29.91 $\pm$ 4.92              | 28.72 $\pm$ 6.00  | 31.30 $\pm$ 2.65  |
|                                             | <i>Helplessness</i>         | 19.23 $\pm$ 4.14              | 18.32 $\pm$ 4.95  | 20.28 $\pm$ 2.57  |
|                                             | <i>Self-efficacy</i>        | 10.67 $\pm$ 1.94              | 10.37 $\pm$ 2.12  | 11.01 $\pm$ 1.66  |

**Table 4: Descriptive statistics of senior leaders' well-being, working situation and work-related stress (gender)**

|                                             |                       | % (n)                         |                   |
|---------------------------------------------|-----------------------|-------------------------------|-------------------|
|                                             |                       | mean $\pm$ standard deviation |                   |
|                                             |                       | Male                          | Female            |
| <b>Total</b>                                |                       | 104 (32.2%)                   | 216 (66.9%)       |
| <b>Working situation</b>                    | <i>Teaching hours</i> | 9.54 $\pm$ 14.33              | 10.69 $\pm$ 15.29 |
|                                             | <i>Workload hours</i> | 55.39 $\pm$ 10.87             | 53.63 $\pm$ 11.50 |
| <b>Workload compared to before COVID-19</b> | <i>Lower</i>          | 5 (5.1%)                      | 7 (3.3%)          |
|                                             | <i>About the same</i> | 30 (30.3%)                    | 61 (28.5%)        |

|                                   |                             |              |               |
|-----------------------------------|-----------------------------|--------------|---------------|
|                                   | <i>Higher</i>               | 64 (64.6%)   | 146 (68.2%)   |
| <b>General health</b>             | <i>Good/very good</i>       | 72 (69.2%)   | 153 (70.8%)   |
|                                   | <i>Mean</i>                 | 2.07 ± 0.98  | 2.09 ± 0.84   |
| <b>WHO-5</b>                      | <i>Mean</i>                 | 42.9 ± 22.91 | 39.79 ± 20.90 |
|                                   | <i>Low well-being</i>       | 65 (63.7%)   | 137 (66.2%)   |
|                                   | <i>Depressive symptoms</i>  | 31 (30.4%)   | 77 (37.2%)    |
| <b>Sense of coherence</b>         | <i>Mean</i>                 | 3.90 ± 1.25  | 3.99 ± 1.18   |
|                                   | <i>Comprehensibility</i>    | 3.58 ± 1.34  | 3.64 ± 1.21   |
|                                   | <i>Manageability</i>        | 3.33 ± 1.39  | 3.34 ± 1.37   |
|                                   | <i>Meaningfulness</i>       | 4.69 ± 1.50  | 4.91 ± 1.45   |
| <b>Exhaustion</b>                 | <i>Mean</i>                 | 3.60 ± 0.83* | 3.81 ± 0.71*  |
|                                   | <i>High/very high</i>       | 87 (83.7%)   | 197 (91.6%)   |
| <b>Psychosomatic complaints</b>   | <i>Mean</i>                 | 2.39 ± 0.81* | 2.84 ± 0.80*  |
| <b>Self-endangering behaviour</b> | <i>Work extensification</i> | 4.21 ± 0.62* | 4.41 ± 0.50*  |
|                                   | <i>Work intensification</i> | 4.09 ± 0.84  | 4.25 ± 0.76   |
|                                   | <i>Quality reduction</i>    | 3.43 ± 0.81  | 3.48 ± 0.73   |
| <b>Perceived stress</b>           | <i>Mean</i>                 | 29.26 ± 5.56 | 30.21 ± 4.56  |
|                                   | <i>Helplessness</i>         | 18.56 ± 4.68 | 19.52 ± 3.79  |
|                                   | <i>Self-efficacy</i>        | 10.71 ± 2.06 | 10.66 ± 1.89  |

\* depicts statistically significant differences between groups

## Working situation

The mean weekly workload for senior leaders in this sample was 54.22 ± 11.3 hours (Wales: 54.93 ± 11.33, Northern Ireland: 53.43 ± 11.26), 76.8% (n=241) reported working at least 50 hours per week during COVID-19. Weekly teaching responsibility was also reported as 10.29 ± 14.97 hours, differences between countries were observed (Wales: 7.12 ± 13.14, Northern Ireland 13.85 ± 16.09 hours). Workload increased during the COVID-19 pandemic compared to before, this was reported by 67.2% (n=211) of the sample (Wales: 55.2%, n=90; Northern Ireland: 80.1%, n=121).

## General health

Senior leaders reported their perceived general health status, with 69.9% (n=226) responding that this was good/very good (Wales: 79.4%, n=135; Northern Ireland: 60.3%, n=91). Male and female senior school leaders

reported similar perceived health status, with 69.2% (n=72) and 70.8 (n=153) reporting this as good/very good, respectively.

## Well-being

Using the WHO-5, senior leaders' mean subjective psychological well-being was  $40.85 \pm 21.57$  (Wales:  $44.93 \pm 21.62$ , Northern Ireland:  $36.09 \pm 20.59$ ). 62.5% (n=202) (Wales: 54.5%, Northern Ireland: 77.6%) were categorised as having low well-being using the cut-off score of  $\leq 50$  determined by Topp et al. [40] and 34.8% (n=108) (Wales: 28.1%, n=47, Northern Ireland: 42.7%, n=61) were below the cut-off for depressive symptoms [41]. Male senior leaders reported higher subjective psychological well-being ( $42.9 \pm 22.9$ ) than female senior leaders ( $39.7 \pm 20.90$ ). Whilst there were minimal gender differences in being classified as having low well-being (males: 63.7%, n=65 females: 66.2%, n=137), females reported higher depressive symptoms (37.2%, n=77) than males (30.4%, n=31).

## Sense of Coherence

Findings regarding work-related SoC indicate that meaningfulness (the extent to which a work situation is seen as worthy of commitment and involvement) was rated the highest ( $4.83 \pm 1.48$ , Wales:  $5.01 \pm 1.49$ , Northern Ireland:  $4.58 \pm 1.43$ ), followed by comprehensibility ( $3.61 \pm 1.26$ , Wales:  $3.83 \pm 1.30$ , Northern Ireland:  $3.36 \pm 1.16$ ), with manageability rated lowest of the three sub-scales ( $3.33 \pm 1.38$ , Wales:  $3.54 \pm 1.42$ , Northern Ireland:  $3.10 \pm 1.31$ ). High mean values indicate stronger SoC, which can suggest coping more efficiently with work stressors (overall SoC whole sample:  $3.95 \pm 1.21$ , Wales:  $4.16 \pm 1.25$ , Northern Ireland:  $3.71 \pm 1.13$ ). This trend was also observed between gender.

## Exhaustion and psychosomatic complaints

Regarding exhaustion, mean values for the sample of senior leaders were  $3.74 \pm 0.76$ . (Wales:  $3.52 \pm 0.80$ , Northern Ireland  $4.00 \pm 0.62$ ), and females ( $3.81 \pm 0.71$ ) reported significantly higher exhaustion compared to males ( $3.60 \pm 0.83$ ,  $t=-2.208$ ,  $p=0.029$ ). Applying the statistical norms proposed by Schaufeli, De Witte and Desart

[43] suggest that 89.0% (n=285) of senior leaders exhibit high/very high exhaustion (Wales: 81.2%, n=183, Northern Ireland: 98%, n=147), and gender differences (males: 83.7%, n=87, females: 91.6%, n=197). Further descriptive data (S3 Fig) shows that senior leaders from Wales and Northern Ireland report often/always feeling mentally exhausted (57.1% and 82%, respectively) and physically exhausted (37.1% and 77.7%, respectively). Exhaustion is a core symptom of work-related burnout, with secondary symptoms including psychosomatic complaints, that is experiencing physical symptoms that are attributed to or exacerbated by mental stress. Most notably, this included often/always experiencing muscle pain such as neck, shoulder and back (Wales: 39.5%, Northern Ireland: 58.2%) and headaches (Wales: 31.9%, Northern Ireland: 38.7%. Statistically significant gender differences were also observed, with female senior leaders reporting higher psychosomatic complaints (females:  $2.84 \pm 0.80$ , high/very: 41.2%, males:  $2.39 \pm 0.81$ , high/very high: 16.1%,  $t=-4.721$ ,  $p<0.001$ ).

## Self-endangering behaviour

The self-endangering work behaviour scale [44] assessed three-sub scales; work extensification, work intensification and quality reduction was used. Regarding extensification of work (i.e. extending working hours), mean values for the senior leaders in this sample were  $4.35 \pm 0.55$ . The distribution of responses indicates that 91.5% (n=293) reported to fairly often/very often worked extra hours in the previous three months, 74.7% (n=239) given up leisure activities in favour of work, and 63.4% (n=202) sacrificing sufficient sleep. Differences between genders were statistically significant ( $t=-2.879$ ,  $p=0.005$ ), with females reporting higher extensification of work than their male counterparts,  $4.41 \pm 0.50$  and  $4.21 \pm 0.62$ , respectively. For work intensification, that is, working at an increased pace and multitasking whilst limiting break periods and work-related social interactions [47], mean values were  $4.20 \pm 0.79$  (whole sample). The majority of senior leaders (fairly often/very often: 74.4%, n=239) reported to work at a pace they found burdensome, that cannot be sustained in the long term (81.3%, n=261), and they know it is not good for them (82.9%, n=266). The third sub scale, quality reduction, reducing the quality of work in reaction to excessive work demands, was rated the lowest by senior leaders (mean values;  $3.47 \pm 0.76$ ).

## Perceived stress

Using the 10-item *Perceived Stress Scale* adapted to the COVID-19 working context for the purpose of this study, findings from the current study present total scores for the sample of senior leaders ( $29.91 \pm 4.92$ ), and sub-scales of perceived helplessness ( $19.23 \pm 4.14$ ), and perceived self-efficacy ( $10.67 \pm 1.94$ ). Gender differences suggest significantly greater perceived helplessness reported by females than males ( $19.52 \pm 3.79$  and  $18.56 \pm 4.68$ , respectively,  $t=-1.996$ ,  $p=0.047$ ). Within items from this sub-scale, nearly half of females (49.6%) reported that they could not cope with all their work tasks (fairly often/very often) compared to 28.8% of males.

## Discussion

This study aimed to examine the working situation, well-being and work-related stress of senior school leaders in Wales and Northern Ireland and explore gender differences during the COVID-19 pandemic between 2021 and 2022. This is part of an ongoing international study through the COVID-HL network, with specific relevance to current and emerging policy and practice in Wales and Northern Ireland. Findings suggest that senior school leaders reported high workloads, low well-being, depressive symptoms and high work-related stress. Senior leaders also had high levels of exhaustion and psychosomatic complaints indicating burnout and were engaging in self-endangering working behaviours, these were significantly higher in female senior leaders. During the COVID-19 pandemic, senior school leaders were exposed to a period of “crisis leadership” [9]. Understanding the impact this had on specific aspects of school leaders' physical and mental health is important, allowing the education and health systems to respond with a targeted approach and appropriate resources. This evidence base can shape and inform policy and directly address the working situation and well-being experiences of leaders in the education system. The findings in the current study supports other work in this area both nationally [15,26–30,48]



284 The majority of senior leaders in this study reported low well-being, lower than the general adult population pre-  
 285 pandemic [49] and COVID-HL international study data from Hong Kong [26,27] and Switzerland [28]. Elsewhere,  
 286 reports from 2020 to 2022 suggest negative impacts of the sustained work-related pressures on senior leaders’  
 287 well-being and mental health [15,50,51]. In this study, females exhibited higher depressive symptoms than males,  
 288 reflecting global data that suggests existing gender disparities in the prevalence of depression widened further  
 289 during COVID-19 [52]. Findings regarding the well-being and mental health of senior school leaders in this study  
 290 have wider implications as evidence demonstrates associations between the well-being of educational  
 291 practitioners and pupil-level outcomes, including health, well-being and educational attainment [53].

292 The large majority of senior leaders in this study reported a higher workload than before the pandemic and  
 293 working at least 50 hours per week. UK-based educational practitioners work longer hours than their international  
 294 colleagues [54], and headteachers in the UK reported to work 20 hours more per week during COVID-19 than  
 295 classroom teachers [55]. These findings are concerning given that high workload has been identified as a key  
 296 reason for staff considering leaving the profession [50], and headteacher retention rates were a concern pre-  
 297 pandemic [11]. This has since been labelled a “crisis” in England, Wales and Northern Ireland [56]. Most recently,  
 298 senior leaders in Wales and Northern Ireland have resorted to industrial action, citing workload, below-inflation  
 299 pay awards and school funding as key concerns within the profession [57,58], suggesting these work-related  
 300 pressures persist.

301 Coping mechanisms to high workload include engaging in self-endangering behaviours that are functional to  
 302 attaining work goals but negatively affect longer-term health, well-being and ability to work [47]. In this study,  
 303 senior leaders reported often giving up leisure activities in favour of work, sacrificing sufficient sleep and waiving  
 304 breaks during the working day. This relates to the transactional stress model, which explains individuals’ cognitive  
 305 and behavioural responses as coping mechanisms to manage internal or external perceived stressors [59]. Females  
 306 were significantly more likely to report self-endangering behaviours, in agreement with research in Germany  
 307 which found that females were more likely to show overcommitting behaviours within their role, overexerting

themselves through excessive work engagement [60]. Furthermore, interesting findings were reported within the Swiss teaching profession which found prolonging working hours mediates the relationship between work overload and exhaustion, thus, work extensification is used as a coping mechanism to high working demands [61]. The majority of senior leaders reported that this level of work was burdensome, cannot be sustained in the long term and was not good for them. Whilst our findings are in line with international study data from Hong Kong, [27], the prevalence of self-endangering behaviours was higher in Wales and Northern Ireland. Given that high work-related pressures are still being reported in the UK [56], it is reasonable to assume that many senior leaders are still engaging in self-endangering behaviours as a mechanism to mediate the negative work-related stressors associated with continued high workloads and working conditions. Whilst necessary to fulfil working demands, this is not conducive to their health and well-being.

Increased workload and self-endangering behaviours can lead to burnout, a psychological syndrome caused by chronic job stressors [62], of which exhaustion is a core symptom [43]. Senior leaders in this study reported very high levels of exhaustion, this is supported by research nationally during COVID-19 which demonstrates that headteachers and senior leaders reported the highest exhaustion compared to other educational practitioners [48]. Exhaustion was also higher in the current study than in international COVID-HL data [30]. Our study also found statistically significant gender differences, with females exhibiting higher exhaustion. These gender differences in school leader populations have also been noted in Sweden [19]. In a review of the role of gender in workplace stress, Gyllensten and Palmer identified a number of contributing factors for females, including increased responsibility for domestic chores, work-family conflicts and additional caring responsibilities (e.g. childcare and elderly parents) [63]. Though this review is broad and considers multiple occupations and not solely senior school leaders, it offers insights into gender differences observed in this study and reflects wider societal gender expectations and norms.

330 Psychosomatic complaints, recognised as physical symptoms attributed to or exacerbated by mental stress, are  
 331 considered secondary symptoms of burnout [43]. Senior leaders in this study also reported higher psychosomatic  
 332 complaints than reported internationally [26], including higher frequencies of headaches and muscle pain (e.g.  
 333 neck, shoulder, back), feeling mentally and physically exhausted and finding it difficult to recover their energy  
 334 after a day of work.[30]. Again, significant gender differences were observed, with females reporting higher  
 335 psychosomatic complaints. Senior leaders in this study may have been at risk of, or were experiencing burnout  
 336 during the COVID-19 pandemic, as reported elsewhere in the UK during this time [48].

337 Further to this and building on the transactional stress model are findings relating to senior leaders' perceived  
 338 stress, this is minimally lower in Wales and Northern Ireland than reported in Hong Kong [26], though significantly  
 339 higher than those in Taiwan [29]. Outside of the COVID-HL international study, findings from Wales and Northern  
 340 Ireland are also significantly higher than teachers elsewhere in the UK [64]. Higher perceived stress has been  
 341 associated with other outcomes, including hormonal changes and disturbances to the menstrual cycle in women  
 342 [65], with females in this study reporting higher perceived helplessness, insomnia [66] and accessing primary care  
 343 services [67]. A framework that explains how people manage stressful situations to maintain their health and well-  
 344 being, a *Sense of Coherence* (SoC) and work-related SoC are used to indicate the health-promoting quality of life  
 345 at work [42]. Senior leaders in this study reported manageability as the lowest of the three sub-scales, suggesting  
 346 they perceived inadequate resources available to cope with the demands of the pandemic. According to the job  
 347 demands-resources model, job resources (physical, psychological, social or organizational) are a central  
 348 component in achieving work goals, reducing job demands and negating the associated  
 349 physiological/psychological impacts [68]. Within this theoretical model, it is proposed that adequate job resources  
 350 can buffer the impact of job demands on job-related strains such as burnout. This emphasizes the importance of  
 351 necessary personal, organisational and governmental support for senior leaders and could be one consideration  
 352 in reducing levels of burnout.

Despite the numerous work-related challenges experienced by senior leaders in this study, meaningfulness, the extent to which a person perceives their work situation as worthy of commitment and involvement, was reported the highest. Senior leaders still valued their role and its contribution, this is supported elsewhere within qualitative work with educational practitioners remaining in challenging working situations who expressed a strong sense of social responsibility within their role [69]. Following a similar trend to other measures in this study, overall SoC was lower than comparable international study data [27,29]. Higher work-related SoC predicted higher subjective well-being scores in Hong Kong[27], and was associated with lower perceived stress and lower likelihood of depressive symptoms in Taiwan [29]. Thus, this indicates stronger SoC acting as a protective factor in the stress, well-being and mental health of senior school leaders, and factors to foster SoC, including adequate resources must be considered.

Ultimately, these findings regarding senior leaders' work-related stress and well-being are concerning, given that Wales and Northern Ireland are currently experiencing a "crisis" in educational leadership against a backdrop of pandemic-related pressures. Assumptions regarding 'bouncing back' have been short-lived; more recent evidence suggests these initial pandemic-related pressures have accumulated with prior strain experienced by senior leaders and are indeed long-lasting. This is supported by survey research from the most recent Headteacher Wellbeing Index in the UK which indicates that the stress levels of educational practitioners increased up to 2022 [15], and evidence examining post-pandemic well-being and burnout from other fields such as healthcare highlights this further [70].

The high attrition rates of senior leaders and other educational practitioners further exacerbate this, proving costly to educational systems and placing additional financial and other pressure on educational settings and policy response. This not only has implications for senior leaders' well-being, work-related stress and issues regarding retention in the profession but also on pupil-level outcomes, including health, well-being and educational attainment [23,53,71].

This study expands current knowledge on the impacts of the COVID-19 pandemic and “*crisis leadership*” on educational leaders in Wales and Northern Ireland. Findings suggest that both tailored and targeted support from the education and health sectors and government are urgently required to improve and optimise the working conditions of senior leaders. Based on the findings from this study, we propose five recommendations for consideration based on lessons learnt and what may mitigate these issues in any future national crises:

i) A more strategic approach to supporting the well-being of educational leaders in Wales and Northern Ireland is essential, including joint working between the health/social care and education sectors to provide mental health support to senior leaders.

ii) In the short term, the mental health and well-being supports currently available from both the education and health/social care sectors should be more explicitly highlighted to senior school leaders.

iii) Further research into what mental health support and resources are needed at individual, organisational and systems level to better support senior leaders in their role.

iv) Greater clarity on the extent and quality of leadership development provision to specifically support leaders' well-being is needed. This is particularly important during periods of major education system-level reforms; leadership is critical to support school and system improvement and ensuring ownership by practitioners.

v) Further research charting changes over time in leaders' experience of their well-being can contribute to strengthening the evidence base in this area. This includes longitudinal research using both quantitative and qualitative methods, extending this research to include senior leaders from nursery and post-16 educational settings and capturing this across the four nations of the UK to contribute to international data.

## Strengths and limitations

This study builds on the evidence base of the impacts of the COVID-19 pandemic on educational settings and extends this to senior school leaders during a period of “*crisis leadership*” in Wales and Northern Ireland. This is part of a wider global study through the COVID-HL network, enabling international comparisons. There are limitations to consider when interpreting the findings from this study. Whilst efforts were made to invite a range of participants through publicly available school contact information and key education stakeholders to increase the response rate, this study reports results obtained from a convenience sample of participants that chose to complete the survey and may not represent the wider senior leadership population. Whilst this study extends our understanding of the impact on school leaders, other educational practitioners are likely to have experienced similar work-related pressures and capturing a wider range of roles and experiences would provide further context to school settings, further research is required here. There is potential for response bias, and the reporting of socially desirable responses. In addition, given the high levels of stress and exhaustion reported in this study, selection bias is possible, the sample consists of more females, and it may be possible that more stressed or exhausted female senior leaders may have chosen to participate in the survey. The cross-sectional self-report survey was administered to a convenience sample of senior leaders in Wales and Northern Ireland at different time points during the COVID-19 pandemic, thus, it would not be helpful to compare between countries. Further longitudinal research using both quantitative and qualitative methods is required, obtaining a representative sample and extending this research across the four nations of the United Kingdom.

## Conclusions

Findings in this study suggest that senior school leaders in Wales and Northern Ireland reported high workloads, low well-being, depressive symptoms, and high work-related stress during the COVID-19 pandemic. Senior leaders also had high levels of exhaustion and psychosomatic complaints indicating burnout and were engaging in self-endangering working behaviours such as sacrificing sufficient sleep. Gender differences were observed, with

females reporting statistically higher exhaustion, psychosomatic complaints, and extensification of work (e.g. extending working hours) than their male counterparts. These findings are concerning, not least because concerns were raised prior to the pandemic regarding the well-being, mental health and working conditions of senior school leaders across the UK, with experts warning of a "*potential crisis in leadership in education*" due to the high numbers leaving the profession [4,10,13]. This has also been observed across other education sectors in the UK, especially higher education [5]. It is likely the COVID-19 pandemic exacerbated this, and further research is required to examine the long-term impacts across school-level and other educational settings and contexts. It is vital to understand the impact the COVID-19 pandemic had on specific aspects of school leaders' physical and mental health to enable the education and health systems to respond with a targeted approach and appropriate resources. This is especially relevant with all four nations of the UK having undergone, or are currently undergoing, major education system-level reforms [72], including new national curricula and qualifications — for example, the start of the new Curriculum for Wales from September 2022 onwards; leadership is critical to support school and system improvement, as well as ensuring ownership by practitioners [73]. This evidence base can thus shape and inform emerging policy and practice to directly address the working situation and well-being experiences of leaders in the education system.

## Acknowledgements

The authors would like to thank the senior school leaders who gave up their time to participate in this research study, particularly during such a challenging period within their roles, we are grateful for their participation. We would like to thank the National Academy for Educational Leadership Wales for their support with this study. Finally, we would like to thank Professor Kevin Dadaczynski and Professor Orkan Okan for their invitation to join the COVID-HL network and their support and guidance with undertaking this research in Wales and Northern Ireland.

## References

1. Crick T. Covid-19 and Digital Education: a Catalyst For Change? ITNOW. 2021 Feb 16;63(1):16–7.
2. Watermeyer R, Crick T, Knight C, Goodall J. COVID-19 and digital disruption in UK universities: afflictions and affordances of emergency online migration. High Educ. 2021;81:623–41.
3. Marchant E, Griffiths L, Crick T, Fry R, Hollinghurst J, James M, et al. COVID-19 mitigation measures in primary schools and association with infection and school staff wellbeing: An observational survey linked with routine data in Wales, UK. PLoS One [Internet]. 2022 Feb 1 [cited 2022 Jul 5];17(2):e0264023. Available from: <https://journals.plos.org/plosone/article?id=10.1371/journal.pone.0264023>
4. Hulme M, Beauchamp G, Clarke L, Hamilton L. Collaboration in Times of Crisis: Leading UK Schools in the Early Stages of a Pandemic. Leadersh Policy Sch. 2023 Jan 2;22(1):161–80.
5. Watermeyer R, Crick T, Knight C. Digital disruption in the time of COVID-19: learning technologists' accounts of institutional barriers to online learning, teaching and assessment in UK universities. Int J Acad Dev. 2022 Apr 3;27(2):148–62.
6. Marchant E, Todd C, James M, Crick T, Dwyer R, Brophy S. Primary school staff perspectives of school closures due to COVID-19, experiences of schools reopening and recommendations for the future: A qualitative survey in Wales. PLoS One [Internet]. 2021 Dec 2 [cited 2022 Jan 20];16(12):e0260396. Available from: <https://journals.plos.org/plosone/article?id=10.1371/journal.pone.0260396>
7. Meinck S, Fraillon J, Strietholt R. The impact of the COVID-19 pandemic on education: International evidence from the Responses to Educational Disruption Survey (REDS) [Internet]. 2022. Available from: <https://unesdoc.unesco.org/ark:/48223/pf0000380398>
8. UNESCO. One year into COVID-19 education disruption: Where do we stand? [Internet]. 2021. Available from: <https://www.unesco.org/en/articles/one-year-covid-19-education-disruption-where-do-we-stand>
9. McLeod S, Dulsky S. Resilience, Reorientation, and Reinvention: School Leadership During the Early Months of the COVID-19 Pandemic. Front Educ. 2021;6.
10. Hamilton L, Beauchamp G, Hulme M, Harvey JA, Clarke L. Challenges for school leadership and management in the four nations of the United Kingdom during the pandemic: conceptual shifts and implications for future thinking. In: Research Handbook on Public Leadership. Edward Elgar Publishing; 2023. p. 80–96.



- 470 11. Welsh Government. Research Study on the Attractiveness of Teaching, and Retention of Teachers. 2019.
- 471 12. Support E. Teacher Wellbeing Index 2019. 2019.
- 472 13. Davies AJ, Milton E, Connolly M, Barrance R. Headteacher Recruitment, Retention and Professional  
473 Development in Wales: Challenges and Opportunities. Wales J Educ [Internet]. 2018 [cited 2023 Aug  
474 16];20(2):204–24. Available from: <https://doi.org/10.16922/wje.20.2.11>
- 475 14. Phillips S, Sen D, McNamee R. Prevalence and causes of self-reported work-related stress in head  
476 teachers. Occup Med (Chic Ill). 2007 Aug 1;57(5):367–76.
- 477 15. Education Support. Teacher Wellbeing Index 2022 [Internet]. 2022. Available from:  
478 <https://www.educationsupport.org.uk/media/zoga2r13/teacher-wellbeing-index-2022.pdf>
- 479 16. Agyapong B, Obuobi-Donkor G, Burbach L, Wei Y. Stress, Burnout, Anxiety and Depression among  
480 Teachers: A Scoping Review. Int J Environ Res Public Health. 2022 Aug 27;19(17):10706.
- 481 17. Scott S, Limbert C, Sykes P. Work-related stress among headteachers in Wales: Prevalence, sources, and  
482 solutions. Educ Manag Adm Leadersh. 2021 Nov 15;174114322110546.
- 483 18. Lückner P, Kästner A, Hannich A, Schmeyers L, Lückner J, Hoffmann W. Stress, Coping and Considerations of  
484 Leaving the Profession—A Cross-Sectional Online Survey of Teachers and School Principals after Two  
485 Years of the Pandemic. Int J Environ Res Public Health. 2022;19(23).
- 486 19. Persson R, Leo U, Arvidsson I, Håkansson C, Nilsson K, Österberg K. Prevalence of exhaustion symptoms  
487 and associations with school level, length of work experience and gender: a nationwide cross-sectional  
488 study of Swedish principals. BMC Public Health. 2021;21(1).
- 489 20. Harris A, Jones M. COVID 19—school leadership in disruptive times. Sch Leadersh Manag. 2020;40(4):243–  
490 7.
- 491 21. Thomson P, Greany T, Martindale N. The trust deficit in England: emerging research evidence about  
492 school leaders and the pandemic. J Educ Adm Hist. 2021 Oct 2;53(3–4):296–300.
- 493 22. Dhuey E, Smith J. How important are school principals in the production of student achievement? Can J  
494 Econ. 2014;47(2).
- 495 23. Estyn. Healthy and happy School impact on pupils’ health and wellbeing [Internet]. 2019 [cited 2023 Aug  
496 18]. Available from: <https://www.estyn.gov.wales/system/files/2022->

01/Healthy%2520and%2520Happy%2520report%2520En\_0.pdf

24. COVID-HL Network. COVID Health Literacy Network [Internet]. 2021 [cited 2023 Aug 18]. Available from: <https://covid-hl.eu/>

25. Dadaczynski K, Okan O, Messer M. COVID-19 Health Literacy School Principals Survey (COVID-HL: School Principal). Questionnaire and Scale Documentation. 2021.

26. Lau SSS, Shum ENY, Man JOT, Cheung ETH, Amoah PA, Leung AYM, et al. Teachers' Well-Being and Associated Factors during the COVID-19 Pandemic: A Cross-Sectional Study in Hong Kong, China. *Int J Environ Res Public Health*. 2022;19(22).

27. Lau SSS, Shum ENY, Man JOT, Cheung ETH, Amoah PA, Leung AYM, et al. A Cross-Sectional Study of the Perceived Stress, Well-Being and Their Relations with Work-Related Behaviours among Hong Kong School Leaders during the COVID-19 Pandemic. *Int J Environ Res Public Health*. 2022;19(23).

28. Betschart S, Sandmeier A, Skedsmo G, Hascher T, Okan O, Dadaczynski K. The Importance of School Leaders' Attitudes and Health Literacy to the Implementation of a Health-Promoting Schools Approach. *Int J Environ Res Public Health*. 2022 Nov 11;19(22):14829.

29. Duong T Van, Nguyen MH, Lai C-F, Chen S-C, Dadaczynski K, Okan O, et al. COVID-19-related fear, stress and depression in school principals: impacts of symptoms like COVID-19, information confusion, health-related activity limitations, working hours, sense of coherence and health literacy. *Ann Med*. 2022 Dec 31;54(1):2064–77.

30. Leksy K, Wójciak M, Gawron G, Muster R, Dadaczynski K, Okan O. Work-Related Stress of Polish School Principals during the COVID-19 Pandemic as a Risk Factor for Burnout. *Int J Environ Res Public Health*. 2023 Jan 1;20(1):805.

31. Todd C, Christian D, Tyler R, Stratton G, Brophy S. Developing HAPPEN (Health and Attainment of Pupils involved in a Primary Education Network): Working in partnership to improve child health and education. *Perspect Public Health*. 2016;136(3).

32. HAPPEN Wales. HAPPEN - Network [Internet]. 2023 [cited 2023 Aug 18]. Available from: <https://happen-wales.co.uk/>

33. Welsh Government. Curriculum for Wales - Hwb [Internet]. 2022 [cited 2023 Aug 18]. Available from: <https://hwb.gov.wales/curriculum-for-wales>

34. National Academy for Educational Leadership Wales. Home - National Leadership Wales [Internet]. 2023 [cited 2023 Aug 18]. Available from: <https://nael.cymru/>
35. Welsh Government. Free School Meals in Wales: Information for Parents and Guardians [Internet]. 2019 [cited 2020 Mar 30]. Available from: <https://gov.wales/free-school-meals-frequently-asked-questions>
36. Education Authority. Apply for Free School Meals / Uniform Grants | Education Authority Northern Ireland [Internet]. 2023 [cited 2023 Aug 18]. Available from: <https://www.eani.org.uk/financial-help/free-school-meals-uniform-grants/apply-for-free-school-meals-uniform-grants>
37. de Bruin A, Picavet HSJ, Nossikov A. Health interview surveys: towards international harmonization of methods and instruments. 1996.
38. Lampert T, Schmidtke C, Borgmann L-S, Poethko-Müller C, Kuntz B. Subjektive Gesundheit bei Erwachsenen in Deutschland. J Heal Monit. 2018;3(2).
39. World Health Organization. Wellbeing measures in primary health care/the DepCare Project: report on a WHO meeting: Stockholm, Sweden, 12–13 February 1998 [Internet]. Stockholm; 1998. Available from: <https://apps.who.int/iris/handle/10665/349766>
40. Topp CW, Dinesen Østergaard S, Søndergaard S, Bech P. The WHO-5 Well-Being Index: A Systematic Review of the Literature. Psychother Psychosom. 2015;84:167–76.
41. Omani-Samani R, Maroufizadeh S, Almasi-Hashiani A, Sepidarkish M, Amini P. The WHO-5 Well-Being Index: A Validation Study in People with Infertility. Iran J Public Health. 2019 Nov;48(11):2058–64.
42. Vogt K, Jenny GJ, Bauer GF. Comprehensibility, manageability and meaningfulness at work: Construct validity of a scale measuring work-related sense of coherence. SA J Ind Psychol. 2013;39(1).
43. Schaufeli W, De Witte H, Desart S. BURNOUT ASSESSMENT TOOL 1 Version 2.0-July 2020. KU Leuven, Belgium; 2020.
44. Krause A, Baeriswyl S, Berset M, Deci N, Dettmers J, Dorsemagen C, et al. Selbstgefährdung als Indikator für Mängel bei der Gestaltung mobil-flexibler Arbeit: Zur Entwicklung eines Erhebungsinstruments. Wirtschaftspsychologie [Internet]. 2015;(4):49–59. Available from: [http://www.psychologie-aktuell.com/index.php?id=184&tx\\_ttnews%5Btt\\_news%5D=3833&tx\\_ttnews%5BbackPid%5D=185&cHash=d51d629405#marker4](http://www.psychologie-aktuell.com/index.php?id=184&tx_ttnews%5Btt_news%5D=3833&tx_ttnews%5BbackPid%5D=185&cHash=d51d629405#marker4)
45. Cohen S, Kamarck T, Mermelstein R. A global measure of perceived stress. J Health Soc Behav.

- 1983;24(4).
46. Schneider EE, Schönfelder S, Domke-Wolf M, Wessa M. Measuring stress in clinical and nonclinical subjects using a German adaptation of the Perceived Stress Scale. *Int J Clin Heal Psychol* [Internet]. 2020 May 1 [cited 2023 Jun 27];20(2):173–81. Available from: <https://pubmed.ncbi.nlm.nih.gov/32550857/>
47. Dettmers J, Deci N, Baeriswyl S, Berset M, Krause A. Self-endangering work behavior. In: *Healthy at Work: Interdisciplinary Perspectives*. 2016.
48. Sundaram N, Abramsky T, Oswald WE, Cook S, Halliday KE, Nguipdop-Djomo P, et al. Implementation of COVID-19 Preventive Measures and Staff Well-Being in a Sample of English Schools 2020-2021. *J Sch Health*. 2023 Apr 30;93(4):266–78.
49. Office for National Statistics. Measuring national well-being: international comparisons - Office for National Statistics [Internet]. 2019 [cited 2023 Aug 16]. Available from: <https://www.ons.gov.uk/peoplepopulationandcommunity/wellbeing/datasets/measuringnationalwellbeinginternationalcomparisons>
50. Education Support. Teacher Wellbeing Index 2020 [Internet]. 2020. Available from: [https://www.educationsupport.org.uk/media/yfrhfjca/teacher\\_wellbeing\\_index\\_2020.pdf](https://www.educationsupport.org.uk/media/yfrhfjca/teacher_wellbeing_index_2020.pdf)
51. Education Support. Teacher Wellbeing Index 2021 [Internet]. 2021. Available from: <https://www.educationsupport.org.uk/media/qzna4gxb/twix-2021.pdf>
52. Santomauro DF, Mantilla Herrera AM, Shadid J, Zheng P, Ashbaugh C, Pigott DM, et al. Global prevalence and burden of depressive and anxiety disorders in 204 countries and territories in 2020 due to the COVID-19 pandemic. *Lancet*. 2021 Nov;398(10312):1700–12.
53. Naghieh A, Montgomery P, Bonell CP, Thompson M, Aber JL. Organisational interventions for improving wellbeing and reducing work-related stress in teachers. *Cochrane Database Syst Rev*. 2015 Apr 8;
54. Allen R, Benhenda A, Jerrim J, Sims S. New evidence on teachers’ working hours in England. An empirical analysis of four datasets. *Res Pap Educ*. 2021;36(6).
55. Jerrim J, Allen R, Sims S. How did the COVID-19 pandemic affect the wellbeing of teachers at work? [Internet]. 2022 [cited 2023 Aug 18]. Available from: [https://johnjerrim.files.wordpress.com/2022/11/working\\_paper\\_pandemic\\_nov\\_22\\_v3.pdf](https://johnjerrim.files.wordpress.com/2022/11/working_paper_pandemic_nov_22_v3.pdf)
56. NAHT. Gone for good: leaders who are lost to the teaching profession [Internet]. 2022. Available from:

581 <https://www.naht.org.uk/Portals/0/PDF's/Campaigns/NAHT-Retention-rate-report-FINAL.pdf>

582 57. Seith E. Welsh heads vote to continue industrial action over pay [Internet]. tes magazine. 2023. Available  
583 from: <https://www.tes.com/magazine/news/general/welsh-headteachers-vote-continue-industrial->  
584 [action-over-pay](https://www.tes.com/magazine/news/general/welsh-headteachers-vote-continue-industrial-action-over-pay)

585 58. Robbie Meredith. Teacher strikes: Five NI unions to take action on 26 April - BBC News. BBC News  
586 [Internet]. 2023 Apr 3 [cited 2023 Aug 18]; Available from: <https://www.bbc.co.uk/news/uk-65166921>

587 59. Lazarus RS, Folkman S. Transactional theory and research on emotions and coping. Eur J Pers. 1987;1(3).

588 60. Kreuzfeld S, Seibt R. Gender-Specific Aspects of Teachers Regarding Working Behavior and Early  
589 Retirement. Front Psychol. 2022;13.

590 61. Sandmeier A, Baeriswyl S, Krause A, Muehlhausen J. Work until you drop: Effects of work overload,  
591 prolonging working hours, and autonomy need satisfaction on exhaustion in teachers. Teach Teach Educ.  
592 2022;118.

593 62. Maslach C, Jackson SE. The measurement of experienced burnout. J Organ Behav. 1981 Apr;2(2):99–113.

594 63. Gyllensten K, Palmer S. The role of gender in workplace stress: A critical literature review. Vol. 64, Health  
595 Education Journal. 2005.

596 64. Butler N, Wilson C, Bates R, Quigg Z, Ashworth E. Sefton School Mental Wellbeing and Resilience Survey  
597 2021 [Internet]. 2021. Available from: [https://www.ljmu.ac.uk/-/media/phi-reports/pdf/2023-01-sefton-](https://www.ljmu.ac.uk/-/media/phi-reports/pdf/2023-01-sefton-school-mental-wellbeing-and-resilience-survey.pdf)  
598 [school-mental-wellbeing-and-resilience-survey.pdf](https://www.ljmu.ac.uk/-/media/phi-reports/pdf/2023-01-sefton-school-mental-wellbeing-and-resilience-survey.pdf)

599 65. Schliep KC, Mumford SL, Vladutiu CJ, Ahrens KA, Perkins NJ, Sjaarda LA, et al. Perceived Stress,  
600 Reproductive Hormones, and Ovulatory Function. Epidemiology. 2015 Mar;26(2):177–84.

601 66. Palagini L, Bruno RM, Cheng P, Mauri M, Taddei S, Ghiadoni L, et al. Relationship between insomnia  
602 symptoms, perceived stress and coping strategies in subjects with arterial hypertension: psychological  
603 factors may play a modulating role. Sleep Med. 2016 Mar;19:108–15.

604 67. Prior A, Vestergaard M, Larsen KK, Fenger-Grøn M. Association between perceived stress, multimorbidity  
605 and primary care health services: a Danish population-based cohort study. BMJ Open. 2018 Feb  
606 24;8(2):e018323.

607 68. Bakker AB, Demerouti E. The Job Demands-Resources model: State of the art. Vol. 22, Journal of

608 Managerial Psychology. 2007.

609 69. Arthur L. What makes teachers decide to stay in challenging schools? | The British Academy [Internet].  
610 The British Academy. 2020 [cited 2023 Aug 18]. Available from:  
611 [https://www.thebritishacademy.ac.uk/blog/summer-showcase-2020-what-makes-teachers-decide-stay-](https://www.thebritishacademy.ac.uk/blog/summer-showcase-2020-what-makes-teachers-decide-stay-challenging-schools/)  
612 [challenging-schools/](https://www.thebritishacademy.ac.uk/blog/summer-showcase-2020-what-makes-teachers-decide-stay-challenging-schools/)

613 70. Zhou T, Xu C, Wang C, Sha S, Wang Z, Zhou Y, et al. Burnout and well-being of healthcare workers in the  
614 post-pandemic period of COVID-19: a perspective from the job demands-resources model. BMC Health  
615 Serv Res. 2022 Dec 2;22(1):284.

616 71. Roffey S. Pupil wellbeing -Teacher wellbeing: Two sides of the same coin? Educ Child Psychol.  
617 2012;29(4):8–17.

618 72. Knight C, Conn C, Crick T, Brooks S. Divergences in the framing of inclusive education across the UK: a  
619 four nations critical policy analysis. Educ Rev. 2023 Jun 22;1–17.

620 73. Harris A, Jones M, Crick T. Curriculum leadership: a critical contributor to school and system  
621 improvement. Sch Leadersh Manag. 2020 Jan 1;40(1):1–4.

622
